# Supplementary material for: Tetra-penta-deca-hexagonal-graphene (TPDH-graphene) hydrogenation patterns: dynamics and electronic structure
Source: Royal Society of Chemistry journal article supplement (doi:10.1039/d3cp00186e), 2023-01-01

## Supplementary Material: Tetra-penta-deca-hexagonal-graphene (TPDH-graphene) hydrogenation patterns: dynamics and electronic structure

Caique C. Oliveira<sup>1</sup>, Matheus Medina<sup>1</sup>, Douglas S. Galvão<sup>2</sup> and Pedro S. Autreto<sup>1</sup>

<sup>1</sup> *Center for Natural and Human Sciences (CCNH), Federal University of ABC, Santo André - SP, 09210-170, Brazil.*

<sup>2</sup> *Applied Physics Department “Gleb Wataghin”, University of Campinas, Campinas - SP, 13083-970, Brazil.*

**Table S.1:** Binding energies of the investigated configurations for adsorption. Beginning with the non-equivalent sites, H atoms are added to the most favorable structures taken as those with highest  $E_b$ . The sequence of sites indicates the order of adsorption.

| Adsorbed Sites | Binding Energy (eV) |
|----------------|---------------------|
| C1             | 3,35                |
| C1'            | 3,35                |
| C2             | 2,43                |
| C3             | 2,34                |
| C4             | 2,65                |
| C5             | 3,35                |
| C5'            | 3,35                |
| C6             | 3,35                |
| C6'            | 3,35                |
| C7             | 3,35                |
| C7'            | 3,35                |
| C1-C2          | 3,04                |
| C1-C3          | 2,70                |
| C1-C4          | 2,78                |

| Adsorbed Sites | Binding Energy (eV) |
|----------------|---------------------|
| C1-C5          | 3,65                |
| C1-C5'         | 2,88                |
| C1-C6          | 2,91                |
| C1-C6'         | 3,20                |
| C1-C7          | 3,33                |
| C1-C7'         | 3,75                |
| C1-C7'-C5      | 3,65                |
| C1-C7'-C5'     | 3,26                |
| C1-C7'-C6      | 3,26                |
| C1-C7'-C6'*    | 3,65                |
| C1-C7'-C5-C6   | 3,50                |
| C1-C7'-C5-C6'  | 4,00                |

**Figure S.1:** Hydrogen adsorption rates for T = 150 K.

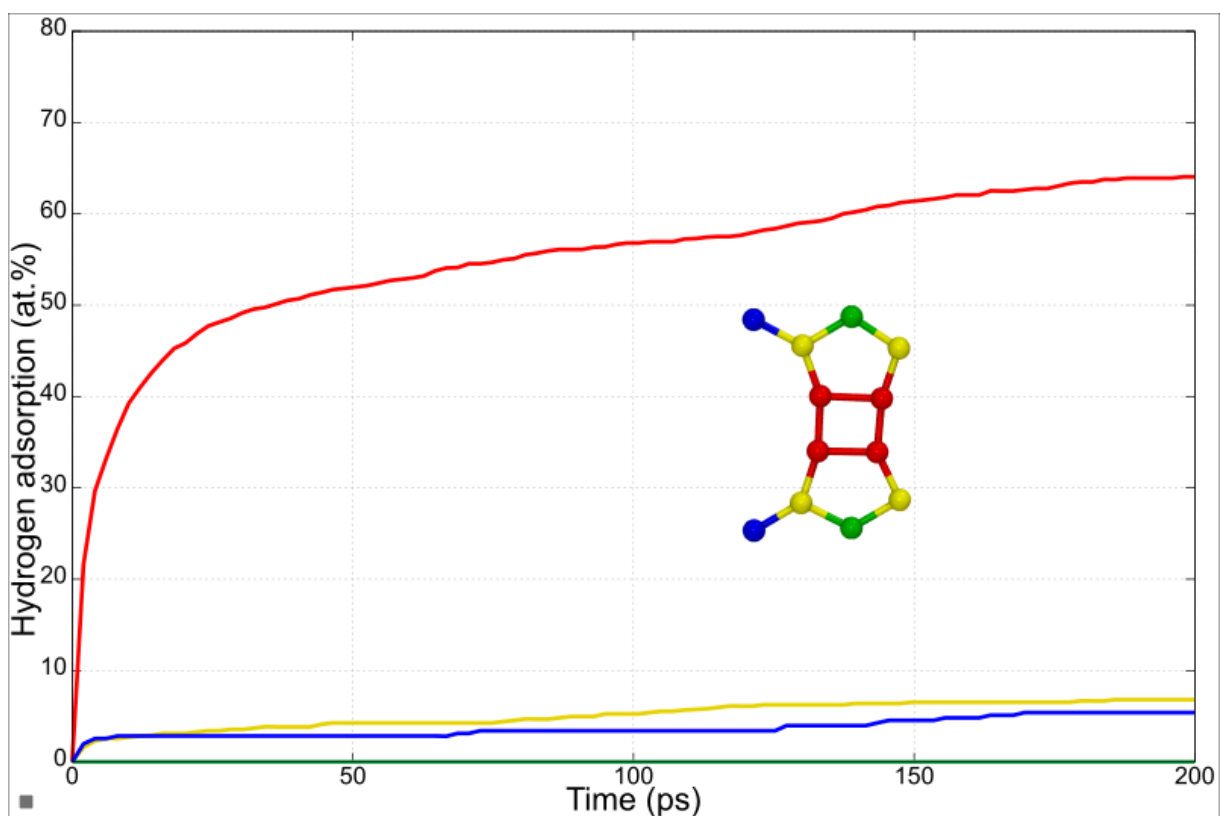

**Figure S.2:** Hydrogen Adsorption rates for  $T = 300$  K.

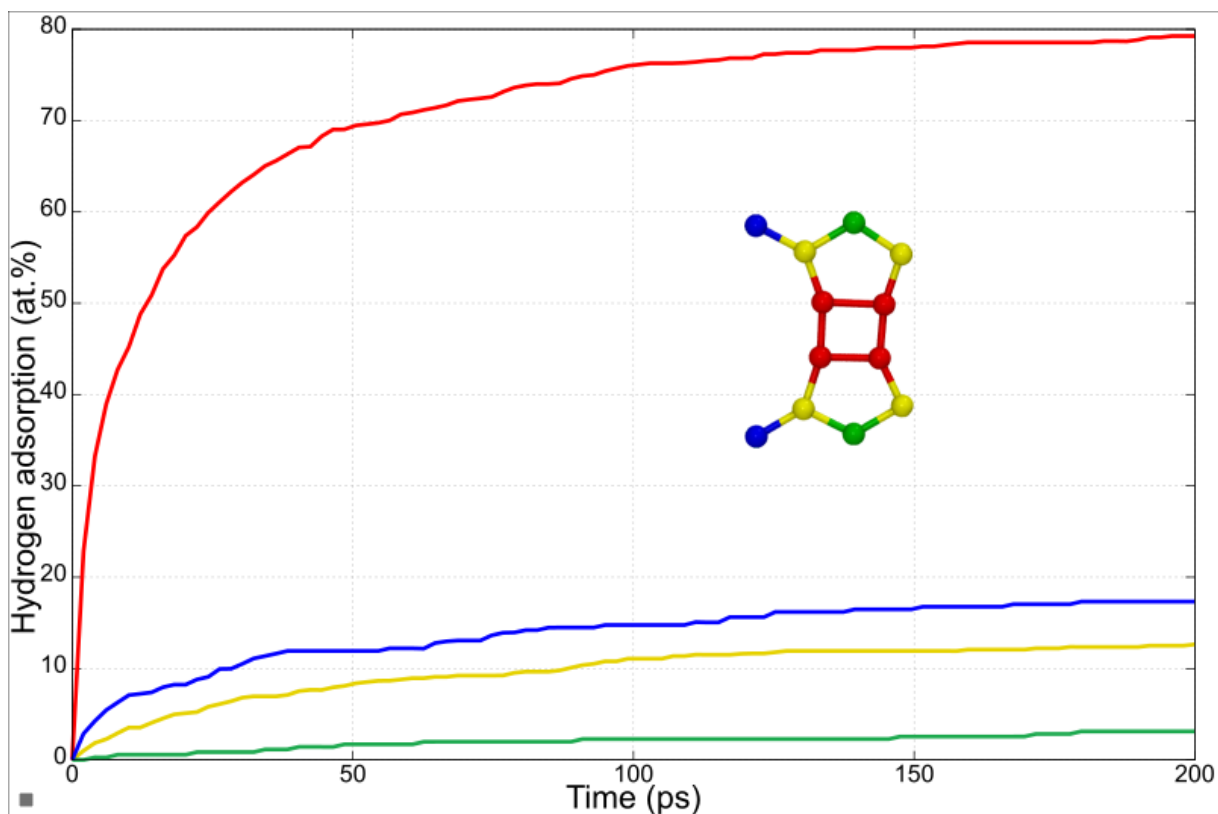

**Figure S.3:** Hydrogen adsorption rates for  $T = 500$  K.

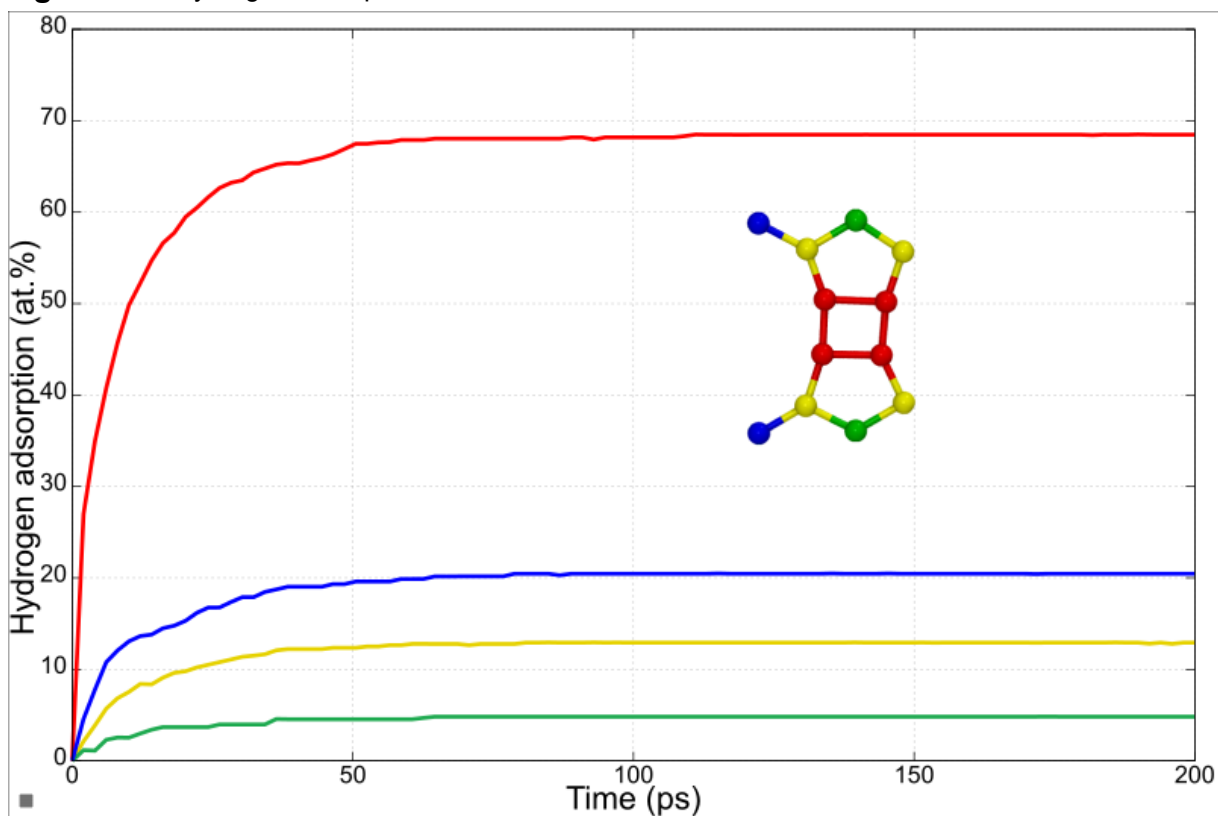

**Figure S.4:** Hydrogen adsorption rates for T = 800 K.

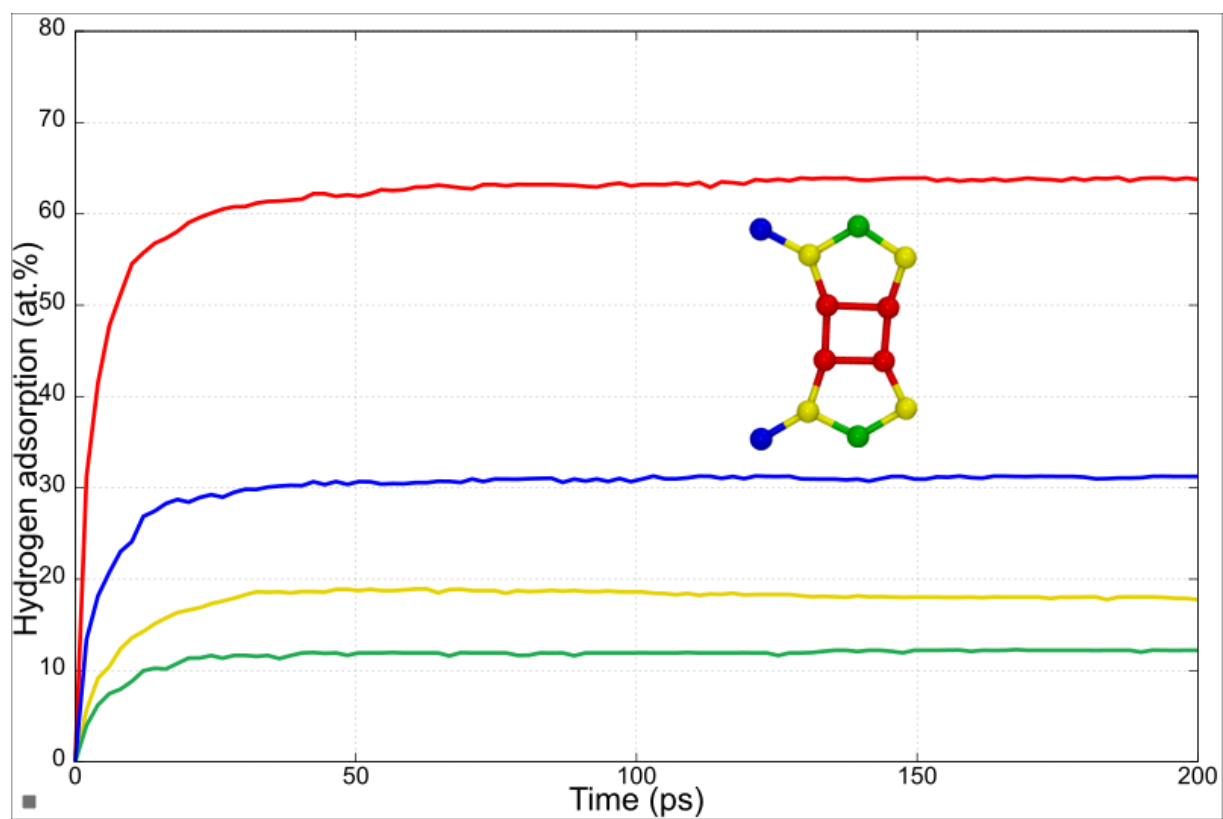

Supplement: d3cp00186e1.pdf [file d3cp00186e1.pdf]
